# Supplementary material for: Prediction of novel target genes and pathways involved in tall cell variant papillary thyroid carcinoma
Source: PubMed Central journal article supplement (PMC6319788; doi:10.1097/md.0000000000013802), 2018-12-21
Supplement: medi-97-e13802-s001.pdf [file medi-97-e13802-s001.pdf]

Supplementary File 1. The R script used in Limma package for identification of DEGs.

The R script used in Limma package for identification of DEGs.

```
path = "/Users/*/*"
setwd(path)

options(max.print=1000000)

dat = read.table("expressionvalues.txt",header=T,sep="\t")
View(head(dat))
dim(dat)

dat1 = dat[,-1]
rownames(dat1) = dat[,1]
View(head(dat1))

write.table(dat.1,"datExp.txt",col.names = T,row.names = T,quote=F,sep="\t")

dat.exp = read.table("datExp.txt",header=T,sep="\t")
View(head(dat.exp))

dat.exp[dat.exp == 0] = 1
dat.exp = log(dat.exp,2)
View(dat.exp)

pheno = NULL
pheno$sample = colnames(dat.exp)
pheno$group = c(rep('tumor',ncol(dat.tumor)),rep('normal',ncol(dat.normal)))
pheno = as.data.frame(pheno)
head(pheno)
```

```

library(limma)
Group = factor(pheno$group,levels=c('tumor','normal'))
design = model.matrix(~0+Group)
colnames(design) <- c('tumor','normal')
design

fit <- lmFit(dat.exp, design)
contrast.matrix <- makeContrasts(tumor-normal,#1
                                levels=design)
fit2 <- contrasts.fit(fit, contrast.matrix)
fit2 <- eBayes(fit2)
all.deg = NULL
diff = topTable(fit2,adjust.method="fdr",coef=1,p.value=0.05,
               lfc=log(2,2),number=50000,sort.by = 'logFC')
write.table(diff,'DEG.txt',col.names=T,row.names=T,quote=F,sep="\t")

```

#pheno\$group can be changed when identifying different compared groups (TCPTC vs cPTC, TCPTC or cPTC vs Normal).

Supplementary Figure S1. OncoPrint of the top 20 mutated genes in the patients with cPTC. BRAF mutation is also the predominant mutation type in cPTC, followed by RET fusion and RAS mutations.

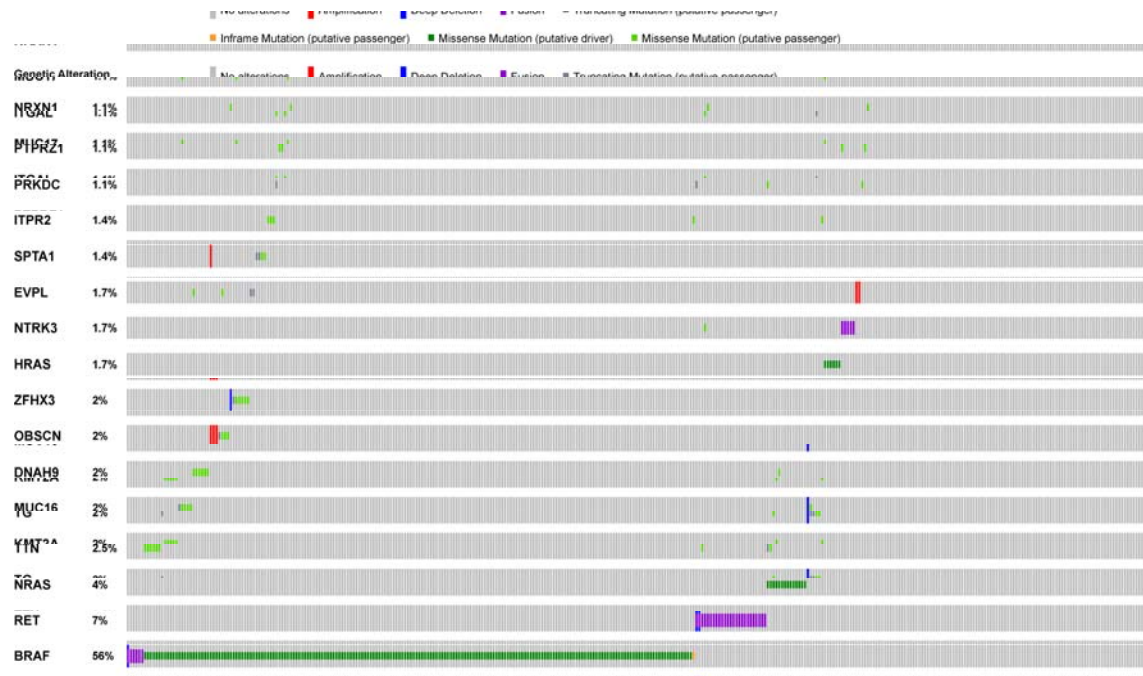

Supplementary Table 1: TCGA sample IDs of 357 cPTC and 35 tall cell variant PTC patients with mRNA sequence and clinical data.

357 cPTC sample IDs

| Sample IDs   | Sample IDs   | Sample IDs   | Sample IDs   |
|--------------|--------------|--------------|--------------|
| TCGA-4C-A93U | TCGA-DJ-A3US | TCGA-EL-A3T7 | TCGA-ET-A3BU |
| TCGA-BJ-A0YZ | TCGA-DJ-A3UU | TCGA-EL-A3T8 | TCGA-ET-A3BV |
| TCGA-BJ-A0Z0 | TCGA-DJ-A3UW | TCGA-EL-A3T9 | TCGA-ET-A3BW |
| TCGA-BJ-A0Z3 | TCGA-DJ-A3UX | TCGA-EL-A3TA | TCGA-ET-A3BX |
| TCGA-BJ-A0Z5 | TCGA-DJ-A3UY | TCGA-EL-A3TB | TCGA-ET-A3DO |
| TCGA-BJ-A0ZA | TCGA-DJ-A3UZ | TCGA-EL-A3ZG | TCGA-ET-A3DP |
| TCGA-BJ-A0ZB | TCGA-DJ-A3V2 | TCGA-EL-A3ZH | TCGA-ET-A3DR |
| TCGA-BJ-A0ZC | TCGA-DJ-A3V3 | TCGA-EL-A3ZK | TCGA-ET-A3DS |
| TCGA-BJ-A0ZE | TCGA-DJ-A3V9 | TCGA-EL-A3ZL | TCGA-ET-A3DT |
| TCGA-BJ-A0ZJ | TCGA-DJ-A3VA | TCGA-EL-A3ZM | TCGA-ET-A3DU |
| TCGA-BJ-A18Y | TCGA-DJ-A3VD | TCGA-EL-A3ZN | TCGA-ET-A40S |
| TCGA-BJ-A18Z | TCGA-DJ-A3VE | TCGA-EL-A3ZO | TCGA-ET-A40T |
| TCGA-BJ-A190 | TCGA-DJ-A3VI | TCGA-EL-A3ZP | TCGA-FE-A230 |
| TCGA-BJ-A192 | TCGA-DJ-A4UL | TCGA-EL-A3ZQ | TCGA-FE-A231 |
| TCGA-BJ-A28R | TCGA-DJ-A4UP | TCGA-EL-A3ZR | TCGA-FE-A232 |
| TCGA-BJ-A28S | TCGA-DJ-A4UT | TCGA-EL-A3ZS | TCGA-FE-A233 |
| TCGA-BJ-A28T | TCGA-DJ-A4V0 | TCGA-EL-A3ZT | TCGA-FE-A234 |
| TCGA-BJ-A28V | TCGA-DJ-A4V2 | TCGA-EL-A4JV | TCGA-FE-A235 |
| TCGA-BJ-A28W | TCGA-DJ-A4V5 | TCGA-EL-A4JW | TCGA-FE-A236 |
| TCGA-BJ-A28Z | TCGA-DO-A1K0 | TCGA-EL-A4JX | TCGA-FE-A237 |
| TCGA-BJ-A291 | TCGA-DO-A2HM | TCGA-EL-A4JZ | TCGA-FE-A238 |
| TCGA-BJ-A2N7 | TCGA-E3-A3E0 | TCGA-EL-A4K0 | TCGA-FE-A239 |
| TCGA-BJ-A2N8 | TCGA-E3-A3E1 | TCGA-EL-A4K1 | TCGA-FE-A23A |
| TCGA-BJ-A2N9 | TCGA-E3-A3E3 | TCGA-EL-A4K2 | TCGA-FE-A3PB |
| TCGA-BJ-A2NA | TCGA-E3-A3E5 | TCGA-EL-A4K4 | TCGA-FE-A3PC |
| TCGA-BJ-A2P4 | TCGA-E8-A242 | TCGA-EL-A4K6 | TCGA-FK-A3SB |
| TCGA-BJ-A3EZ | TCGA-E8-A2EA | TCGA-EL-A4K7 | TCGA-FK-A3SD |
| TCGA-BJ-A3F0 | TCGA-E8-A2JQ | TCGA-EL-A4K9 | TCGA-FK-A3SE |

|              |              |              |              |
|--------------|--------------|--------------|--------------|
| TCGA-BJ-A3PR | TCGA-E8-A3X7 | TCGA-EL-A4KD | TCGA-FK-A3SG |
| TCGA-BJ-A3PT | TCGA-E8-A413 | TCGA-EL-A4KG | TCGA-FK-A3SH |
| TCGA-BJ-A3PU | TCGA-E8-A414 | TCGA-EL-A4KH | TCGA-FK-A4UB |
| TCGA-BJ-A45C | TCGA-E8-A415 | TCGA-EL-A4KI | TCGA-FY-A2QD |
| TCGA-BJ-A45E | TCGA-E8-A416 | TCGA-EM-A1CS | TCGA-FY-A3BL |
| TCGA-BJ-A45F | TCGA-E8-A417 | TCGA-EM-A1CT | TCGA-FY-A3I4 |
| TCGA-BJ-A45H | TCGA-E8-A418 | TCGA-EM-A1CU | TCGA-FY-A3NM |
| TCGA-BJ-A45K | TCGA-E8-A419 | TCGA-EM-A1CV | TCGA-FY-A3NN |
| TCGA-BJ-A408 | TCGA-E8-A432 | TCGA-EM-A22I | TCGA-FY-A3ON |
| TCGA-CE-A13K | TCGA-E8-A433 | TCGA-EM-A22K | TCGA-FY-A3R6 |
| TCGA-CE-A27D | TCGA-E8-A434 | TCGA-EM-A22M | TCGA-FY-A3R7 |
| TCGA-CE-A3MD | TCGA-E8-A436 | TCGA-EM-A22O | TCGA-FY-A3R8 |
| TCGA-CE-A3ME | TCGA-E8-A437 | TCGA-EM-A22P | TCGA-FY-A3R9 |
| TCGA-CE-A481 | TCGA-E8-A438 | TCGA-EM-A2CS | TCGA-FY-A3RA |
| TCGA-CE-A482 | TCGA-E8-A44K | TCGA-EM-A2OX | TCGA-FY-A3TY |
| TCGA-CE-A483 | TCGA-E8-A44M | TCGA-EM-A2OZ | TCGA-FY-A3YR |
| TCGA-CE-A484 | TCGA-EL-A3CL | TCGA-EM-A2P0 | TCGA-FY-A40K |
| TCGA-CE-A485 | TCGA-EL-A3CM | TCGA-EM-A2P1 | TCGA-FY-A40L |
| TCGA-DE-A0XZ | TCGA-EL-A3CN | TCGA-EM-A2P3 | TCGA-FY-A40M |
| TCGA-DE-A0Y2 | TCGA-EL-A3C0 | TCGA-EM-A3AK | TCGA-FY-A4B0 |
| TCGA-DE-A0Y3 | TCGA-EL-A3CR | TCGA-EM-A3AN | TCGA-FY-A4B3 |
| TCGA-DE-A3KN | TCGA-EL-A3CS | TCGA-EM-A3A0 | TCGA-FY-A4B4 |
| TCGA-DE-A4M8 | TCGA-EL-A3CT | TCGA-EM-A3AQ | TCGA-FY-A76V |
| TCGA-DE-A4M9 | TCGA-EL-A3CU | TCGA-EM-A3AR | TCGA-GE-A2C6 |
| TCGA-DE-A4MA | TCGA-EL-A3CV | TCGA-EM-A3FJ | TCGA-H2-A26U |
| TCGA-DE-A4MB | TCGA-EL-A3CW | TCGA-EM-A3FK | TCGA-H2-A2K9 |
| TCGA-DE-A4MC | TCGA-EL-A3CX | TCGA-EM-A3FM | TCGA-H2-A3RI |
| TCGA-DE-A4MD | TCGA-EL-A3CY | TCGA-EM-A3FO | TCGA-H2-A421 |
| TCGA-DE-A69J | TCGA-EL-A3CZ | TCGA-EM-A3FQ | TCGA-H2-A422 |
| TCGA-DE-A69K | TCGA-EL-A3D0 | TCGA-EM-A3FR | TCGA-IM-A3EB |
| TCGA-DE-A7U5 | TCGA-EL-A3D1 | TCGA-EM-A303 | TCGA-IM-A3ED |
| TCGA-DJ-A130 | TCGA-EL-A3D4 | TCGA-EM-A307 | TCGA-IM-A420 |
| TCGA-DJ-A13P | TCGA-EL-A3D5 | TCGA-EM-A3SU | TCGA-J8-A3NZ |

|              |              |              |              |
|--------------|--------------|--------------|--------------|
| TCGA-DJ-A13T | TCGA-EL-A3D6 | TCGA-EM-A3SX | TCGA-J8-A300 |
| TCGA-DJ-A13U | TCGA-EL-A3G0 | TCGA-EM-A3SZ | TCGA-J8-A301 |
| TCGA-DJ-A13V | TCGA-EL-A3GP | TCGA-EM-A4FF | TCGA-J8-A302 |
| TCGA-DJ-A1QD | TCGA-EL-A3GR | TCGA-EM-A4FM | TCGA-J8-A3YD |
| TCGA-DJ-A1QE | TCGA-EL-A3GS | TCGA-EM-A4FN | TCGA-J8-A3YE |
| TCGA-DJ-A1QF | TCGA-EL-A3GU | TCGA-EM-A4FO | TCGA-J8-A3YF |
| TCGA-DJ-A1QI | TCGA-EL-A3GV | TCGA-EM-A4FV | TCGA-J8-A3YG |
| TCGA-DJ-A1QN | TCGA-EL-A3GW | TCGA-ET-A25J | TCGA-J8-A3YH |
| TCGA-DJ-A1QQ | TCGA-EL-A3GX | TCGA-ET-A25K | TCGA-J8-A42S |
| TCGA-DJ-A2PN | TCGA-EL-A3GY | TCGA-ET-A25M | TCGA-J8-A4HW |
| TCGA-DJ-A2P0 | TCGA-EL-A3GZ | TCGA-ET-A25N | TCGA-J8-A4HY |
| TCGA-DJ-A2PQ | TCGA-EL-A3H1 | TCGA-ET-A250 | TCGA-KS-A41F |
| TCGA-DJ-A2PR | TCGA-EL-A3H2 | TCGA-ET-A25P | TCGA-KS-A41J |
| TCGA-DJ-A2PS | TCGA-EL-A3H3 | TCGA-ET-A2MX | TCGA-KS-A4I1 |
| TCGA-DJ-A2PU | TCGA-EL-A3H4 | TCGA-ET-A2MY | TCGA-KS-A4I3 |
| TCGA-DJ-A2PV | TCGA-EL-A3H5 | TCGA-ET-A2MZ | TCGA-KS-A4I5 |
| TCGA-DJ-A2PW | TCGA-EL-A3H7 | TCGA-ET-A2N0 | TCGA-KS-A4I7 |
| TCGA-DJ-A2PZ | TCGA-EL-A3H8 | TCGA-ET-A39J | TCGA-KS-A4I9 |
| TCGA-DJ-A2Q0 | TCGA-EL-A3MW | TCGA-ET-A39K | TCGA-KS-A4IB |
| TCGA-DJ-A2Q1 | TCGA-EL-A3MX | TCGA-ET-A39L | TCGA-KS-A4IC |
| TCGA-DJ-A2Q4 | TCGA-EL-A3MY | TCGA-ET-A39M | TCGA-L6-A4EP |
| TCGA-DJ-A2Q5 | TCGA-EL-A3MZ | TCGA-ET-A39N | TCGA-L6-A4EQ |
| TCGA-DJ-A2Q6 | TCGA-EL-A3N2 | TCGA-ET-A39P | TCGA-MK-A4N6 |
| TCGA-DJ-A2Q7 | TCGA-EL-A3N3 | TCGA-ET-A39R | TCGA-MK-A4N7 |
| TCGA-DJ-A2QC | TCGA-EL-A3T0 | TCGA-ET-A39S | TCGA-MK-A4N9 |
| TCGA-DJ-A3UK | TCGA-EL-A3T1 | TCGA-ET-A3BN | TCGA-QD-A8IV |
| TCGA-DJ-A3UM | TCGA-EL-A3T2 | TCGA-ET-A3BP |              |
| TCGA-DJ-A3UN | TCGA-EL-A3T3 | TCGA-ET-A3BQ |              |
| TCGA-DJ-A3U0 | TCGA-EL-A3T6 | TCGA-ET-A3BS |              |

---

35 tall cell variant PTC sample IDs

---

| Sample IDs   | Sample IDs   | Sample IDs   | Sample IDs   |
|--------------|--------------|--------------|--------------|
| TCGA-BJ-A0Z9 | TCGA-DJ-A2PT | TCGA-DJ-A3V8 | TCGA-ET-A3B0 |
| TCGA-BJ-A0ZH | TCGA-DJ-A2PY | TCGA-DJ-A3VB | TCGA-ET-A3BT |
| TCGA-BJ-A28X | TCGA-DJ-A2Q3 | TCGA-DJ-A3VF | TCGA-ET-A3DW |
| TCGA-BJ-A290 | TCGA-DJ-A2Q9 | TCGA-DJ-A4UW | TCGA-ET-A40Q |
| TCGA-BJ-A45I | TCGA-DJ-A3UQ | TCGA-DJ-A4V4 | TCGA-ET-A4KN |
| TCGA-BJ-A45J | TCGA-DJ-A3V0 | TCGA-ET-A25G | TCGA-IM-A3U2 |
| TCGA-DJ-A13L | TCGA-DJ-A3V4 | TCGA-ET-A25L | TCGA-IM-A3U3 |
| TCGA-DJ-A1QH | TCGA-DJ-A3V5 | TCGA-ET-A25R | TCGA-L6-A4EU |
| TCGA-DJ-A1Q0 | TCGA-DJ-A3V7 | TCGA-ET-A390 |              |

---

Supplementary Table 2. Average Expression values; fold change and p values of 301 TCPTC-specific DEGs from the three comparison groups (TCPTC versus cPTC tissues, TCPTC versus normal tissues, and cPTC versus normal tissues)

| Genename | Average                   | TCPTC vs cPTC |             | TCPTC vs normal |             | cPTC vs normal |             |
|----------|---------------------------|---------------|-------------|-----------------|-------------|----------------|-------------|
|          | Expression<br>(log2 RSEM) | logFC         | adj. P. Val | logFC           | adj. P. Val | logFC          | adj. P. Val |
| COL11A1  | 4.320328743               | 4.018401445   | 3.26E-06    | 6.973672851     | 1.02E-24    | 2.955271406    | 2.63E-09    |
| MMP13    | 2.304903159               | 3.597314254   | 1.71E-06    | 5.711421788     | 1.20E-23    | 2.114107535    | 5.72E-07    |
| VTCN1    | 4.709527828               | 2.9403214     | 0.000141773 | 7.074526406     | 2.96E-31    | 4.134205006    | 9.05E-19    |
| COL10A1  | 5.874990034               | 2.80217714    | 4.67E-05    | 4.245557583     | 2.81E-20    | 1.443380443    | 0.000282059 |
| SLC18A3  | 2.367109323               | 2.736262009   | 7.15E-05    | 4.941958603     | 9.38E-22    | 2.205696594    | 2.34E-08    |
| MMP7     | 6.573233658               | 2.710259896   | 0.000152514 | 5.778336597     | 1.56E-18    | 3.068076701    | 2.41E-12    |
| SFRP2    | 8.553188932               | 2.669864426   | 0.000964924 | 1.035554736     | 0.030270249 | -1.63430969    | 0.000896524 |
| CD1A     | 5.299930361               | 2.636947489   | 8.96E-05    | 6.214090571     | 6.18E-26    | 3.577143081    | 1.40E-17    |
| SFTPB    | 12.93550709               | 2.560261262   | 0.000975954 | 6.746901589     | 2.20E-27    | 4.186640327    | 1.20E-17    |
| C2CD4A   | 6.018512625               | 2.549583266   | 7.15E-05    | 6.252363216     | 5.84E-32    | 3.70277995     | 1.04E-20    |
| CST1     | 2.21893159                | 2.524702333   | 0.000440831 | 4.674808596     | 9.76E-18    | 2.150106264    | 2.88E-07    |
| CD177    | 3.949632805               | 2.430512593   | 0.001948031 | 5.80611098      | 7.32E-21    | 3.375598387    | 1.47E-12    |
| FRMD5    | 5.713423458               | 2.366387913   | 4.67E-05    | 5.578202702     | 1.88E-35    | 3.211814789    | 6.15E-20    |
| CST2     | 3.923062646               | 2.353509596   | 0.0009027   | 6.388595329     | 2.86E-30    | 4.035085734    | 1.50E-20    |



|          |              |              |              |              |           |              |              |
|----------|--------------|--------------|--------------|--------------|-----------|--------------|--------------|
| CCL17    | 4. 713596587 | 2. 350740293 | 0. 00027576  | 4. 938641907 | 1. 07E-18 | 2. 587901614 | 7. 80E-11    |
| CHI3L1   | 11. 57962833 | 2. 303230235 | 0. 001304987 | 6. 540848184 | 4. 69E-26 | 4. 237617949 | 9. 19E-21    |
| CD207    | 5. 593464797 | 2. 268371993 | 0. 000235671 | 5. 365796717 | 1. 43E-19 | 3. 097424725 | 2. 51E-15    |
| TM7SF4   | 9. 621974524 | 2. 24768038  | 0. 008618867 | 9. 02763954  | 7. 85E-37 | 6. 77995916  | 1. 85E-33    |
| S100B    | 6. 138893796 | 2. 247677117 | 0. 000221567 | 3. 59768634  | 1. 44E-20 | 1. 350009222 | 0. 000245816 |
| CCL20    | 4. 113516161 | 2. 246214666 | 7. 07E-05    | 5. 331552853 | 1. 18E-23 | 3. 085338187 | 8. 86E-19    |
| ADCY8    | 5. 599732716 | 2. 237657353 | 0. 002972288 | 7. 794321428 | 9. 11E-39 | 5. 556664075 | 7. 78E-31    |
| SLC6A14  | 4. 486387713 | 2. 234871435 | 0. 00066512  | 4. 865470083 | 5. 50E-21 | 2. 630598648 | 4. 56E-11    |
| IVL      | 5. 334242928 | 2. 219252707 | 0. 001580937 | 7. 165641031 | 9. 90E-36 | 4. 946388323 | 1. 77E-28    |
| 729884   | 4. 129650128 | 2. 180433035 | 0. 001729691 | 6. 316655744 | 8. 19E-34 | 4. 136222708 | 4. 41E-22    |
| PDZK1IP1 | 9. 010334388 | 2. 171632739 | 0. 000625107 | 6. 125850822 | 1. 27E-28 | 3. 954218083 | 1. 94E-22    |
| DMBX1    | 4. 025497513 | 2. 160147558 | 0. 002171934 | 6. 389629959 | 1. 09E-38 | 4. 229482401 | 3. 16E-22    |
| CIQL2    | 3. 005059934 | 2. 14443079  | 0. 001830978 | 3. 597070019 | 3. 09E-10 | 1. 452639229 | 0. 00071721  |
| MUC21    | 7. 153179807 | 2. 144136281 | 0. 003565675 | 8. 575211844 | 6. 28E-36 | 6. 431075563 | 2. 35E-39    |
| CLDN10   | 7. 263770034 | 2. 134897808 | 0. 008460674 | 8. 152739042 | 4. 73E-40 | 6. 017841234 | 9. 51E-31    |
| PPAPDC1A | 2. 689976643 | 2. 133023725 | 7. 15E-05    | 3. 23264194  | 5. 39E-18 | 1. 099618214 | 0. 000519985 |
| CXCL17   | 7. 208500541 | 2. 125895552 | 0. 000336326 | 5. 897579309 | 3. 57E-30 | 3. 771683757 | 3. 93E-23    |
| CYP26A1  | 1. 541700034 | 2. 125775434 | 1. 42E-05    | 3. 609723199 | 1. 43E-16 | 1. 483947766 | 5. 72E-08    |
| LCN2     | 8. 620002003 | 2. 112942282 | 0. 000817288 | 6. 331849273 | 2. 67E-28 | 4. 218906991 | 5. 56E-26    |

|          |              |              |              |              |           |              |              |
|----------|--------------|--------------|--------------|--------------|-----------|--------------|--------------|
| TMEM92   | 5. 591057678 | 2. 112349934 | 0. 000819858 | 7. 656012115 | 9. 63E-45 | 5. 543662182 | 2. 46E-40    |
| RAB27B   | 2. 630724321 | 2. 08967273  | 0. 000440831 | 4. 045918697 | 6. 78E-21 | 1. 956245967 | 4. 34E-08    |
| C19orf59 | 3. 907424447 | 2. 037102186 | 0. 000544443 | 5. 603176121 | 6. 82E-30 | 3. 566073936 | 3. 94E-22    |
| ARSI     | 3. 7292533   | 2. 017790849 | 0. 000198282 | 3. 765905531 | 2. 01E-21 | 1. 748114682 | 6. 76E-08    |
| TMPRSS4  | 9. 334330474 | 2. 003217678 | 0. 003479956 | 8. 508088747 | 3. 74E-40 | 6. 504871068 | 5. 52E-44    |
| PSG8     | 3. 513680951 | 2. 002044603 | 0. 010677543 | 5. 354595957 | 5. 76E-21 | 3. 352551353 | 7. 75E-13    |
| SLC28A3  | 2. 448514808 | 1. 982444735 | 0. 000111899 | 3. 50215178  | 4. 03E-17 | 1. 519707045 | 7. 90E-07    |
| TMPRSS6  | 8. 83678605  | 1. 981840957 | 0. 013938075 | 9. 110170178 | 9. 56E-42 | 7. 128329221 | 7. 51E-41    |
| RETN     | 1. 772697873 | 1. 968174445 | 0. 000294649 | 3. 717526271 | 1. 44E-16 | 1. 749351826 | 1. 53E-08    |
| SYT12    | 6. 112867106 | 1. 947051524 | 0. 001367693 | 4. 344833484 | 2. 36E-29 | 2. 397781959 | 6. 63E-11    |
| ST6GALNA | 6. 880431528 | 1. 942484133 | 0. 005799205 | 6. 486008385 | 4. 71E-36 | 4. 543524252 | 1. 49E-24    |
| CEACAM6  | 6. 543988402 | 1. 938316051 | 0. 007851541 | 6. 609312564 | 1. 43E-25 | 4. 670996514 | 5. 74E-24    |
| ALOX5    | 9. 895614602 | 1. 937619337 | 0. 00027576  | 4. 849751753 | 5. 22E-23 | 2. 912132416 | 7. 23E-18    |
| CD1B     | 2. 381524986 | 1. 936322652 | 0. 000241132 | 3. 175283282 | 1. 05E-11 | 1. 23896063  | 0. 000148399 |
| WNT7A    | 1. 843923405 | 1. 90707828  | 0. 000216785 | 3. 487469718 | 8. 12E-17 | 1. 580391438 | 1. 83E-07    |
| B3GNT3   | 8. 72660745  | 1. 887902894 | 0. 008209085 | 7. 649820669 | 2. 25E-35 | 5. 761917776 | 1. 66E-34    |
| DSC3     | 5. 667949112 | 1. 883503537 | 0. 006781485 | 5. 451385832 | 1. 12E-19 | 3. 567882295 | 1. 82E-16    |
| POSTN    | 9. 937592266 | 1. 865499163 | 8. 96E-05    | 3. 739340789 | 1. 50E-20 | 1. 873841627 | 3. 05E-11    |
| MYBPH    | 3. 890029313 | 1. 857826494 | 0. 00185329  | 5. 492188443 | 2. 02E-27 | 3. 634361949 | 1. 17E-22    |

|          |             |             |             |              |            |              |             |
|----------|-------------|-------------|-------------|--------------|------------|--------------|-------------|
| APCDD1L  | 1.90668846  | 1.856389838 | 7.15E-05    | 3.561223233  | 9.40E-21   | 1.704833395  | 8.60E-10    |
| SLC34A2  | 14.91639838 | 1.847503609 | 0.003815772 | 6.763098328  | 6.41E-45   | 4.91559472   | 2.56E-32    |
| PROM1    | 4.048790235 | 1.83857816  | 0.003000705 | -1.948849814 | 1.50E-05   | -3.787427974 | 3.92E-22    |
| RP1      | 1.670174268 | 1.836568155 | 0.000216785 | 3.420441432  | 1.53E-16   | 1.583873277  | 5.44E-08    |
| PSG1     | 4.277220214 | 1.835638797 | 0.006243357 | 6.125827762  | 1.40E-29   | 4.290188965  | 4.15E-25    |
| IL22RA2  | 1.657618269 | 1.829666037 | 0.000226264 | 2.938224945  | 3.98E-13   | 1.108558908  | 0.000173388 |
| FN1      | 17.52421496 | 1.821789771 | 0.000903223 | 7.001308772  | 2.73E-50   | 5.179519001  | 2.14E-44    |
| GPR115   | 2.921955067 | 1.817033448 | 0.001930985 | 4.766074884  | 7.87E-26   | 2.949041436  | 9.15E-17    |
| SAA1     | 2.308379612 | 1.812393727 | 0.002118269 | 3.058592496  | 7.94E-10   | 1.246198769  | 0.00057497  |
| OMD      | 4.329646581 | 1.805940252 | 0.006329188 | -1.631688668 | 0.00019943 | -3.43762892  | 6.83E-18    |
| VGLL1    | 3.862381928 | 1.803788099 | 0.003575182 | 5.47512369   | 5.98E-37   | 3.671335591  | 1.37E-21    |
| CXCL5    | 2.839875677 | 1.796810477 | 0.001541752 | 4.494157253  | 2.57E-27   | 2.697346776  | 5.03E-15    |
| SAA2     | 1.954986537 | 1.771771648 | 0.002550927 | 3.195101451  | 1.56E-10   | 1.423329803  | 4.95E-05    |
| SLPI     | 10.02490438 | 1.741528304 | 0.002473199 | 4.303643324  | 5.15E-24   | 2.56211502   | 1.76E-13    |
| ALDH3B2  | 2.694689126 | 1.717389343 | 4.67E-05    | 4.520543673  | 1.45E-30   | 2.80315433   | 4.99E-28    |
| HLA-DQB2 | 8.071486394 | 1.699525179 | 0.000539641 | 4.020575243  | 7.02E-14   | 2.321050065  | 6.12E-13    |
| COL1A1   | 13.25194687 | 1.693673844 | 0.00027576  | 3.621021585  | 4.18E-22   | 1.927347741  | 5.22E-12    |
| CCL22    | 5.746767496 | 1.692568341 | 0.001424019 | 2.922097618  | 8.71E-10   | 1.229529277  | 0.000307643 |
| FUT9     | 1.723128322 | 1.68621358  | 0.00561117  | 3.628259631  | 4.03E-14   | 1.942046051  | 2.84E-08    |

|          |              |              |              |               |           |               |           |
|----------|--------------|--------------|--------------|---------------|-----------|---------------|-----------|
| NMU      | 6. 171298671 | 1. 685383752 | 0. 034740302 | 6. 814441854  | 1. 51E-25 | 5. 129058103  | 6. 03E-25 |
| TNFSF18  | 1. 725274972 | 1. 684371423 | 0. 000107785 | 3. 618259255  | 1. 09E-22 | 1. 933887832  | 5. 36E-14 |
| SERPINB2 | 1. 914597879 | 1. 683057297 | 0. 001222044 | 3. 223836119  | 7. 27E-15 | 1. 540778822  | 6. 08E-07 |
| ADAM12   | 6. 229578091 | 1. 680029096 | 0. 000199058 | 3. 582736743  | 1. 05E-15 | 1. 902707646  | 3. 15E-12 |
| ADAMTS14 | 5. 841033543 | 1. 676155136 | 0. 000814501 | 5. 533319127  | 1. 41E-27 | 3. 85716399   | 4. 32E-31 |
| MMP11    | 7. 912247583 | 1. 654370095 | 6. 42E-05    | 4. 596746854  | 1. 03E-29 | 2. 942376759  | 8. 64E-31 |
| C15orf48 | 7. 301892924 | 1. 651775739 | 0. 000216785 | 2. 724845846  | 1. 09E-15 | 1. 073070108  | 5. 68E-05 |
| EREG     | 3. 656928704 | 1. 650006067 | 0. 011523788 | 4. 659977411  | 5. 36E-19 | 3. 009971344  | 3. 05E-14 |
| CD70     | 3. 758236597 | 1. 647803235 | 0. 004589663 | 3. 901359671  | 3. 11E-14 | 2. 253556436  | 5. 83E-10 |
| AHNAK2   | 10. 62110081 | 1. 642449775 | 6. 42E-05    | 4. 733698288  | 1. 78E-44 | 3. 091248513  | 1. 90E-33 |
| SDR16C5  | 3. 436355887 | 1. 622324639 | 0. 007678955 | 4. 335761616  | 3. 08E-18 | 2. 713436978  | 4. 95E-13 |
| SFN      | 8. 329691586 | 1. 605928821 | 0. 004740177 | 5. 244722847  | 2. 14E-28 | 3. 638794026  | 9. 69E-24 |
| KCNN4    | 9. 315738395 | 1. 602096027 | 0. 003456311 | 5. 645425749  | 3. 07E-27 | 4. 043329723  | 1. 66E-28 |
| KRT16    | 2. 129724111 | 1. 58424902  | 0. 010717099 | 3. 643049138  | 1. 18E-12 | 2. 058800117  | 8. 84E-09 |
| FUT3     | 4. 144518766 | 1. 581971862 | 0. 003884889 | 5. 696096181  | 2. 54E-34 | 4. 11412432   | 6. 24E-32 |
| 11-Mar   | 1. 347454188 | 1. 572459949 | 0. 000805208 | 2. 897397281  | 7. 72E-19 | 1. 324937332  | 1. 24E-06 |
| SYT1     | 9. 761840301 | 1. 570011091 | 0. 037070525 | 8. 870015092  | 8. 95E-43 | 7. 300004002  | 3. 75E-47 |
| FIBIN    | 5. 633609395 | 1. 567050078 | 0. 002792939 | -1. 264655695 | 8. 00E-07 | -2. 831705772 | 1. 35E-18 |
| WDR69    | 1. 390201967 | 1. 540846604 | 0. 000350494 | 2. 975997998  | 3. 18E-22 | 1. 435151394  | 2. 99E-08 |

|         |              |              |              |              |           |               |           |
|---------|--------------|--------------|--------------|--------------|-----------|---------------|-----------|
| LPPR1   | 1. 286285363 | 1. 538437335 | 0. 000876923 | 3. 159057121 | 2. 26E-17 | 1. 620619786  | 3. 05E-09 |
| KLK10   | 9. 739873335 | 1. 529589337 | 0. 046804983 | 7. 304834554 | 1. 71E-36 | 5. 775245217  | 2. 40E-32 |
| CAPN8   | 2. 403985907 | 1. 529389738 | 0. 002506739 | 3. 608721714 | 6. 92E-18 | 2. 079331976  | 2. 92E-12 |
| FAM101A | 3. 051134966 | 1. 518351604 | 0. 000356665 | 3. 103624846 | 3. 12E-18 | 1. 585273242  | 1. 00E-09 |
| VCAN    | 9. 078241797 | 1. 516677498 | 0. 000719447 | 2. 708980737 | 4. 37E-15 | 1. 192303239  | 9. 73E-06 |
| CST5    | 3. 148211113 | 1. 505753038 | 0. 007845872 | 4. 766471157 | 1. 77E-30 | 3. 26071812   | 2. 38E-21 |
| COMP    | 8. 454769032 | 1. 497681186 | 0. 038408231 | 5. 761700321 | 5. 30E-19 | 4. 264019134  | 3. 04E-21 |
| CFTR    | 2. 27216564  | 1. 492025579 | 0. 003035446 | 2. 800355137 | 1. 45E-18 | 1. 308329558  | 1. 62E-05 |
| CTHRC1  | 7. 421805003 | 1. 488429072 | 0. 001424019 | 2. 882734515 | 9. 80E-18 | 1. 394305444  | 5. 75E-07 |
| CPNE4   | 5. 123881869 | 1. 486453347 | 0. 036402619 | 5. 455600093 | 2. 70E-23 | 3. 969146747  | 1. 14E-19 |
| SRPX2   | 5. 293474362 | 1. 476250187 | 0. 000539641 | 2. 75190293  | 1. 22E-18 | 1. 275652743  | 4. 47E-07 |
| C2CD4B  | 5. 300427802 | 1. 473941326 | 0. 001955223 | 2. 839320856 | 7. 54E-11 | 1. 36537953   | 4. 60E-06 |
| CDH22   | 5. 608579738 | 1. 466255776 | 0. 007051992 | 4. 02371571  | 1. 68E-25 | 2. 557459934  | 1. 76E-14 |
| CCR8    | 1. 733775323 | 1. 458817883 | 0. 000653302 | 2. 501091009 | 7. 93E-12 | 1. 042273126  | 9. 05E-05 |
| IGFL2   | 5. 703059812 | 1. 452328991 | 0. 035921178 | 6. 297405725 | 9. 79E-25 | 4. 845076735  | 9. 39E-29 |
| SPOCD1  | 5. 003880699 | 1. 436439884 | 0. 000857659 | 4. 173691429 | 2. 42E-33 | 2. 737251545  | 5. 85E-24 |
| DCN     | 10. 1306421  | 1. 435944826 | 0. 006676868 | -1. 47642911 | 1. 22E-06 | -2. 912373936 | 2. 38E-19 |
| OR13A1  | 1. 674188488 | 1. 422586914 | 0. 000710045 | 2. 963419056 | 1. 13E-14 | 1. 540832142  | 3. 13E-09 |
| MUC1    | 10. 80998662 | 1. 409017621 | 0. 001572993 | 3. 414701895 | 2. 03E-27 | 2. 005684275  | 2. 93E-13 |

|          |             |             |             |             |          |             |             |
|----------|-------------|-------------|-------------|-------------|----------|-------------|-------------|
| ASPHD1   | 5.033155077 | 1.406519    | 0.001899081 | 5.472719016 | 3.84E-34 | 4.066200015 | 5.47E-40    |
| PHACTR3  | 4.014218161 | 1.392446254 | 0.008845824 | 4.23875943  | 8.87E-26 | 2.846313175 | 6.15E-18    |
| MATN3    | 4.501425569 | 1.389630667 | 0.000199058 | 2.626809997 | 9.58E-20 | 1.237179331 | 1.01E-08    |
| PLAU     | 11.33822923 | 1.387227459 | 0.000505741 | 4.3316127   | 1.22E-35 | 2.944385241 | 1.86E-30    |
| LRRN4    | 1.943658793 | 1.386500623 | 0.001740515 | 2.420419325 | 4.71E-13 | 1.033918702 | 0.000123659 |
| S100A2   | 8.4240234   | 1.373060538 | 0.000439835 | 2.631148873 | 3.54E-14 | 1.258088335 | 2.55E-08    |
| CLDN16   | 8.570253971 | 1.367041823 | 0.031489519 | 6.535760065 | 6.99E-36 | 5.168718242 | 4.27E-36    |
| GALNT5   | 4.54593732  | 1.36618653  | 0.010128103 | 4.126991761 | 1.54E-25 | 2.760805231 | 4.81E-17    |
| C19orf21 | 6.762978586 | 1.365263774 | 0.010661052 | 4.749943583 | 7.87E-26 | 3.38467981  | 7.85E-23    |
| ADRB3    | 1.137277511 | 1.361119646 | 0.000332484 | 2.633596619 | 6.23E-21 | 1.272476973 | 2.02E-08    |
| NKD2     | 4.038464453 | 1.355612009 | 0.002118269 | 2.931688019 | 1.34E-12 | 1.57607601  | 4.83E-09    |
| GOLGA7B  | 7.279480294 | 1.355250952 | 0.000331801 | 3.392516895 | 5.23E-21 | 2.037265942 | 5.88E-17    |
| TMEM100  | 7.283089624 | 1.354651279 | 0.0063401   | 3.358905639 | 3.53E-24 | 2.004254359 | 2.93E-11    |
| P2RY6    | 6.750494429 | 1.353023434 | 8.75E-05    | 3.076702774 | 5.54E-22 | 1.723679339 | 1.16E-15    |
| BIRC7    | 5.197805479 | 1.338475448 | 0.044017681 | 5.876282236 | 4.68E-27 | 4.537806788 | 3.39E-28    |
| COL5A1   | 9.7638314   | 1.329175504 | 0.000857659 | 2.466110303 | 1.73E-15 | 1.136934799 | 1.32E-06    |
| SERPINA1 | 14.83397139 | 1.321066158 | 0.004288164 | 5.714351026 | 2.14E-46 | 4.393284869 | 1.76E-44    |
| ABCA12   | 1.929960235 | 1.315670894 | 0.002689485 | 3.606912905 | 2.47E-23 | 2.291242011 | 3.63E-18    |
| MARCO    | 6.974142366 | 1.312170455 | 0.033996435 | 3.950471129 | 2.95E-11 | 2.638300674 | 1.57E-11    |

|          |             |             |             |             |          |             |          |
|----------|-------------|-------------|-------------|-------------|----------|-------------|----------|
| ALOX15B  | 9.36686668  | 1.311910138 | 0.011290811 | 4.353356919 | 1.94E-23 | 3.041446781 | 1.74E-20 |
| DEPDC1B  | 6.968400741 | 1.311707911 | 0.00251955  | 2.949248017 | 3.45E-18 | 1.637540106 | 1.49E-09 |
| SFTA2    | 4.079811946 | 1.310618119 | 0.007144775 | 3.482863197 | 2.89E-15 | 2.172245077 | 5.19E-13 |
| HES2     | 4.689424186 | 1.30716547  | 0.002915458 | 4.814458181 | 7.90E-25 | 3.50729271  | 7.90E-33 |
| C11orf41 | 3.960257573 | 1.301080303 | 0.004157766 | 2.58927207  | 1.17E-15 | 1.288191767 | 2.22E-06 |
| PLAC2    | 4.684879325 | 1.300109708 | 0.030096391 | 4.71720214  | 7.21E-23 | 3.417092432 | 1.89E-21 |
| TNFSF11  | 3.266628391 | 1.294811646 | 0.014596074 | 3.027217206 | 1.01E-08 | 1.73240556  | 4.42E-07 |
| STAC     | 6.495710867 | 1.291920575 | 0.005123022 | 4.291421837 | 6.76E-34 | 2.999501262 | 7.88E-25 |
| COL19A1  | 3.17150888  | 1.291564574 | 0.027386031 | 3.439255297 | 5.12E-10 | 2.147690723 | 2.08E-09 |
| CYP2S1   | 8.042059853 | 1.29138732  | 0.006022103 | 4.859123248 | 1.48E-33 | 3.567735927 | 7.24E-31 |
| GPR87    | 2.433320537 | 1.281276884 | 0.010521459 | 3.729595342 | 1.02E-16 | 2.448318458 | 7.80E-17 |
| IL1F5    | 4.261174232 | 1.2798147   | 0.002901    | 4.975657396 | 7.40E-34 | 3.695842696 | 4.72E-38 |
| PNP      | 10.5061761  | 1.278440388 | 7.07E-05    | 2.889194022 | 2.50E-21 | 1.610753634 | 3.13E-17 |
| TRIM63   | 3.906260547 | 1.272894957 | 0.010468451 | 4.287356843 | 9.47E-18 | 3.014461886 | 5.32E-21 |
| DHDH     | 4.074734443 | 1.267213901 | 0.002984667 | 4.614342957 | 8.21E-30 | 3.347129056 | 6.40E-33 |
| SLC18A2  | 1.214780257 | 1.266334258 | 0.003533398 | 2.700398873 | 7.30E-14 | 1.434064615 | 2.14E-08 |
| CRLF2    | 2.554345384 | 1.266102971 | 0.018116141 | 3.842269448 | 6.16E-26 | 2.576166477 | 4.31E-16 |
| CCL13    | 5.680330974 | 1.259882722 | 0.018399612 | 4.025941243 | 1.97E-20 | 2.766058521 | 1.75E-16 |
| SEZ6L2   | 8.909687294 | 1.255991303 | 0.003157621 | 4.7194018   | 3.42E-38 | 3.463410497 | 3.14E-35 |

|          |              |              |              |               |           |               |           |
|----------|--------------|--------------|--------------|---------------|-----------|---------------|-----------|
| CCNA1    | 4. 862400424 | 1. 253615881 | 0. 011582582 | 3. 836589826  | 1. 55E-22 | 2. 582973944  | 2. 17E-17 |
| ACTBL2   | 3. 953926924 | 1. 244544592 | 0. 010073206 | 5. 358417279  | 5. 14E-35 | 4. 113872688  | 5. 05E-39 |
| TACSTD2  | 12. 46610108 | 1. 242449078 | 0. 032384004 | 5. 25003778   | 3. 22E-34 | 4. 007588703  | 1. 09E-27 |
| AZU1     | 1. 226414866 | 1. 235042741 | 0. 013253846 | 2. 755714839  | 1. 32E-13 | 1. 520672098  | 1. 28E-07 |
| SPRR1B   | 1. 371508124 | 1. 234167222 | 0. 024073571 | 2. 675020083  | 3. 59E-11 | 1. 440852862  | 3. 65E-06 |
| CSF2     | 3. 847096644 | 1. 229926183 | 0. 008618867 | 5. 116170296  | 1. 55E-40 | 3. 886244113  | 4. 50E-38 |
| DCHS2    | 4. 879281342 | 1. 22552968  | 0. 00101595  | 3. 34341428   | 1. 58E-24 | 2. 1178846    | 1. 23E-19 |
| EBI3     | 6. 162932071 | 1. 212497911 | 0. 000821291 | 3. 429037945  | 3. 85E-14 | 2. 216540034  | 5. 23E-19 |
| F2RL2    | 3. 971469873 | 1. 204220549 | 0. 00906528  | 3. 19083869   | 1. 42E-13 | 1. 98661814   | 1. 46E-12 |
| RHOV     | 5. 914172246 | 1. 195506254 | 0. 001810068 | 2. 899975181  | 1. 54E-22 | 1. 704468927  | 3. 38E-13 |
| IL1RN    | 7. 982234381 | 1. 192284055 | 0. 001756707 | 2. 530390202  | 4. 48E-18 | 1. 338106147  | 1. 14E-08 |
| C10orf55 | 5. 271741593 | 1. 19007139  | 0. 002047094 | 4. 156376447  | 7. 86E-34 | 2. 966305058  | 4. 96E-32 |
| FLJ42709 | 7. 883465526 | 1. 187332674 | 0. 001126081 | 3. 765851064  | 4. 53E-48 | 2. 57851839   | 1. 33E-28 |
| DUSP13   | 3. 221052921 | 1. 183409009 | 0. 019506265 | 4. 472676914  | 1. 77E-27 | 3. 289267905  | 1. 04E-25 |
| PVRL4    | 8. 986144325 | 1. 182082718 | 0. 006185661 | 5. 961319082  | 6. 12E-42 | 4. 779236364  | 1. 16E-54 |
| CNTN1    | 1. 425833312 | 1. 181956728 | 0. 024427667 | -2. 327380738 | 8. 49E-08 | -3. 509337466 | 1. 24E-27 |
| SOX11    | 3. 760598523 | 1. 181063044 | 0. 025430755 | 4. 306345272  | 8. 30E-23 | 3. 125282227  | 2. 23E-21 |
| HLA-G    | 8. 068078796 | 1. 172544464 | 0. 012528858 | 2. 974899018  | 1. 01E-13 | 1. 802354554  | 4. 67E-10 |
| CFB      | 10. 8327853  | 1. 171573206 | 0. 020986707 | 2. 653477997  | 1. 86E-13 | 1. 481904791  | 2. 09E-06 |



|          |              |              |              |              |           |              |           |
|----------|--------------|--------------|--------------|--------------|-----------|--------------|-----------|
| ARSE     | 2. 759092984 | 1. 168439436 | 0. 001896895 | 2. 877834432 | 1. 99E-17 | 1. 709394995 | 7. 92E-14 |
| CDH4     | 5. 634307555 | 1. 164075429 | 0. 038517644 | 4. 594317228 | 1. 63E-23 | 3. 430241799 | 1. 16E-22 |
| C19orf33 | 9. 358542382 | 1. 162315207 | 0. 005238996 | 3. 458032382 | 7. 56E-24 | 2. 295717175 | 1. 74E-18 |
| CITED1   | 11. 33963777 | 1. 160806098 | 0. 036747747 | 5. 791456585 | 1. 19E-30 | 4. 630650486 | 6. 96E-39 |
| EPHA10   | 7. 191945435 | 1. 156174766 | 0. 008550866 | 5. 265966267 | 9. 56E-42 | 4. 109791502 | 6. 89E-44 |
| KRT19    | 12. 37926227 | 1. 150001118 | 0. 004740177 | 3. 507209002 | 1. 01E-32 | 2. 357207884 | 1. 83E-20 |
| NGEF     | 9. 320597238 | 1. 140681914 | 0. 019287413 | 6. 577108548 | 3. 64E-42 | 5. 436426634 | 5. 54E-57 |
| CDKN2A   | 5. 736289159 | 1. 139910676 | 0. 004432694 | 4. 190978475 | 3. 39E-21 | 3. 051067799 | 2. 12E-31 |
| GNLY     | 7. 18175996  | 1. 138048196 | 0. 018026444 | 2. 7901058   | 1. 10E-10 | 1. 652057605 | 1. 35E-08 |
| SULT2B1  | 6. 877081228 | 1. 13803458  | 0. 003349664 | 2. 821010891 | 2. 62E-17 | 1. 682976311 | 2. 71E-12 |
| CDKN2BAS | 1. 643407151 | 1. 136439603 | 0. 001202483 | 2. 713726625 | 2. 12E-22 | 1. 577287022 | 4. 44E-13 |
| HCN4     | 6. 246659077 | 1. 132096441 | 0. 009410435 | 5. 955758728 | 6. 99E-36 | 4. 823662287 | 3. 32E-54 |
| TNC      | 10. 83286418 | 1. 125292004 | 0. 009236398 | 3. 412659945 | 7. 82E-17 | 2. 287367941 | 1. 91E-16 |
| TNFAIP6  | 4. 424288193 | 1. 12342333  | 0. 002648959 | 3. 219803519 | 4. 98E-13 | 2. 096380188 | 5. 69E-18 |
| UNC5CL   | 7. 054706499 | 1. 117337586 | 0. 000541541 | 3. 695403073 | 1. 12E-38 | 2. 578065487 | 2. 03E-34 |
| WBSCR26  | 4. 984806455 | 1. 113067225 | 0. 011569754 | 3. 103155232 | 1. 36E-16 | 1. 990088008 | 4. 89E-13 |
| CD164L2  | 5. 696555244 | 1. 112972898 | 0. 018514791 | 4. 844109595 | 5. 35E-27 | 3. 731136696 | 3. 26E-34 |
| LAMB3    | 11. 41986097 | 1. 111770288 | 0. 01986355  | 5. 452836589 | 3. 78E-38 | 4. 341066301 | 2. 54E-42 |
| SPTBN2   | 8. 355354356 | 1. 107203484 | 0. 001496801 | 4. 989481855 | 2. 26E-40 | 3. 882278372 | 5. 80E-55 |

|         |              |              |              |               |              |               |              |
|---------|--------------|--------------|--------------|---------------|--------------|---------------|--------------|
| LPPR3   | 1. 503731092 | 1. 104657186 | 0. 00744341  | 2. 906033522  | 2. 40E-20    | 1. 801376336  | 2. 62E-13    |
| FAM178B | 4. 94821449  | 1. 082272837 | 0. 021238967 | 6. 000008102  | 7. 94E-43    | 4. 917735265  | 7. 71E-53    |
| FBLN1   | 9. 13713764  | 1. 081902675 | 0. 015433376 | -1. 521532467 | 8. 68E-06    | -2. 603435141 | 7. 53E-22    |
| HPGDS   | 5. 091518017 | 1. 080066389 | 0. 000625107 | 2. 749365198  | 5. 99E-20    | 1. 669298808  | 9. 45E-17    |
| OR4D10  | 2. 199452884 | 1. 075360887 | 0. 020089447 | 3. 25125239   | 1. 24E-23    | 2. 175891503  | 1. 03E-15    |
| AQP9    | 4. 612849666 | 1. 075131246 | 0. 013279782 | 2. 579876153  | 1. 03E-09    | 1. 504744907  | 4. 42E-08    |
| VSTM2L  | 7. 641089644 | 1. 068865697 | 0. 006223388 | 3. 300944014  | 3. 35E-23    | 2. 232078317  | 5. 23E-20    |
| EN1     | 1. 365641888 | 1. 067328602 | 0. 004746329 | 2. 317988862  | 3. 52E-13    | 1. 25066026   | 5. 80E-08    |
| FAT2    | 5. 761954191 | 1. 06479009  | 0. 006744918 | 2. 224959656  | 8. 80E-12    | 1. 160169566  | 8. 35E-07    |
| BEAN    | 6. 908997928 | 1. 062601274 | 0. 001766101 | 3. 310918341  | 4. 12E-34    | 2. 248317067  | 2. 12E-25    |
| PMAIP1  | 6. 830916855 | 1. 046533287 | 0. 002524124 | 2. 70618231   | 6. 11E-14    | 1. 659649024  | 1. 92E-13    |
| MRAP2   | 1. 11634961  | 1. 046216921 | 0. 00517113  | -1. 03993126  | 0. 000390357 | -2. 086148181 | 7. 99E-20    |
| PPEF1   | 2. 560441459 | 1. 029534677 | 0. 007444646 | 2. 47249486   | 1. 94E-15    | 1. 442960183  | 3. 73E-10    |
| PDLIM4  | 10. 96114957 | 1. 026715927 | 0. 023335593 | 4. 374537311  | 2. 37E-40    | 3. 347821384  | 4. 14E-31    |
| SPINK2  | 4. 427217697 | 1. 025636932 | 0. 004699801 | 3. 342294673  | 4. 14E-15    | 2. 316657741  | 3. 58E-22    |
| HLA-DOB | 6. 157465548 | 1. 025626396 | 0. 018378845 | 2. 15767322   | 0. 000116174 | 1. 132046824  | 0. 000189192 |
| GABRB2  | 10. 46589561 | 1. 021196142 | 0. 043081875 | 8. 501323154  | 2. 90E-48    | 7. 480127012  | 2. 69E-83    |
| SLC30A2 | 9. 765677441 | 1. 01951476  | 0. 013387784 | 2. 168949435  | 6. 41E-14    | 1. 149434675  | 5. 01E-06    |
| IBSP    | 1. 719116326 | 1. 009092797 | 0. 033778904 | 2. 868768226  | 1. 32E-15    | 1. 859675429  | 6. 74E-12    |

|          |             |              |             |              |          |              |          |
|----------|-------------|--------------|-------------|--------------|----------|--------------|----------|
| AIM1L    | 3.859741793 | 1.003154926  | 0.010318736 | 3.62686279   | 1.89E-21 | 2.623707864  | 1.43E-26 |
| MPPED2   | 6.193477822 | -1.015150415 | 0.037141457 | -4.982113739 | 9.11E-39 | -3.966963324 | 3.96E-38 |
| KIT      | 7.844291224 | -1.016096753 | 0.018388435 | -4.410472539 | 2.29E-26 | -3.394375786 | 1.06E-36 |
| HLF      | 7.660476647 | -1.017502893 | 0.006185661 | -3.504327475 | 1.42E-29 | -2.486824582 | 3.34E-27 |
| ATP4A    | 1.47313169  | -1.02109402  | 0.016390792 | -3.288968587 | 3.28E-22 | -2.267874566 | 3.60E-18 |
| C5orf23  | 6.939636263 | -1.024402815 | 0.020810353 | -2.91341443  | 1.05E-19 | -1.889011615 | 1.59E-12 |
| ZSCAN1   | 3.890828492 | -1.024614933 | 0.000649169 | -2.21918922  | 9.00E-20 | -1.194574287 | 4.99E-11 |
| LOC28479 | 0.710698247 | -1.029134808 | 0.003849029 | -2.878428297 | 2.30E-25 | -1.849293489 | 4.93E-17 |
| RYR2     | 5.053383747 | -1.029669854 | 0.036124693 | -5.728016197 | 4.18E-35 | -4.698346342 | 7.85E-49 |
| TRPM5    | 1.98861564  | -1.029731937 | 0.010560213 | -3.352338302 | 2.32E-17 | -2.322606365 | 6.66E-21 |
| UTS2R    | 2.541732638 | -1.029820073 | 0.041638922 | -3.03200632  | 4.53E-09 | -2.002186247 | 3.89E-10 |
| COLEC11  | 5.215060343 | -1.030814417 | 0.00870923  | -2.431155083 | 8.04E-16 | -1.400340665 | 1.62E-09 |
| CCDC108  | 3.656591644 | -1.03128571  | 0.007267941 | -2.285444139 | 7.27E-16 | -1.254158428 | 4.89E-08 |
| WBSCR17  | 7.143694848 | -1.032369298 | 0.029296639 | -2.692975875 | 1.18E-19 | -1.660606576 | 2.35E-09 |
| BTBD11   | 8.29107075  | -1.035346225 | 0.000964924 | -2.997280493 | 3.47E-34 | -1.961934268 | 5.00E-24 |
| TDH      | 1.332289149 | -1.035894229 | 0.017594595 | -4.032472958 | 1.82E-30 | -2.996578729 | 5.63E-28 |
| KATNAL2  | 6.060974004 | -1.037312909 | 0.000226264 | -3.079004882 | 6.17E-33 | -2.041691973 | 7.76E-31 |
| RSPH6A   | 5.299063825 | -1.043632996 | 0.010407824 | -2.44100666  | 2.25E-17 | -1.397373663 | 5.25E-09 |
| LRRC7    | 3.706055993 | -1.056286551 | 0.032782245 | -4.035533724 | 4.12E-23 | -2.979247173 | 5.31E-24 |

|          |             |              |             |              |          |              |          |
|----------|-------------|--------------|-------------|--------------|----------|--------------|----------|
| LOC10014 | 1.606945666 | -1.058590371 | 0.00282432  | -2.371710255 | 2.50E-16 | -1.313119885 | 1.67E-09 |
| GABRG1   | 1.570337992 | -1.063836508 | 0.02322313  | -2.176089968 | 5.57E-11 | -1.11225346  | 8.89E-05 |
| C10orf82 | 4.077279236 | -1.064692526 | 0.025608787 | -2.678885265 | 2.08E-13 | -1.614192739 | 4.10E-09 |
| MYT1     | 4.167088331 | -1.066442942 | 0.001208106 | -2.322652507 | 1.67E-17 | -1.256209565 | 2.17E-10 |
| SRRM4    | 1.039842673 | -1.073044215 | 0.030382843 | -2.667839375 | 3.14E-16 | -1.59479516  | 1.15E-07 |
| SFTPC    | 1.395089866 | -1.07619473  | 0.040627807 | -4.543990841 | 5.20E-27 | -3.467796111 | 5.51E-27 |
| 90288    | 4.517773756 | -1.083828933 | 7.15E-05    | -2.138765972 | 1.07E-18 | -1.054937039 | 3.09E-11 |
| C1QTNF4  | 1.616098784 | -1.084283867 | 0.013390073 | -2.892917343 | 3.15E-16 | -1.808633476 | 6.44E-12 |
| FLJ42875 | 5.608293008 | -1.086389698 | 0.001565276 | -3.207103986 | 1.62E-29 | -2.120714289 | 3.54E-23 |
| NEB      | 4.602429912 | -1.08780668  | 0.041586707 | -4.532542199 | 4.05E-23 | -3.444735519 | 2.66E-24 |
| CECR2    | 2.449726868 | -1.091116325 | 0.012943683 | -4.481108776 | 6.08E-25 | -3.389992451 | 1.22E-33 |
| KIF19    | 3.054740082 | -1.093560197 | 0.04716767  | -4.964175151 | 2.05E-29 | -3.870614954 | 1.55E-30 |
| CLCNKA   | 4.398790804 | -1.109265728 | 0.029395296 | -4.542022425 | 7.76E-33 | -3.432756697 | 1.01E-27 |
| DIRAS2   | 3.864845778 | -1.118279803 | 0.006744918 | -4.438126104 | 1.06E-34 | -3.319846302 | 3.57E-36 |
| FHL1     | 10.96614835 | -1.122195903 | 0.00177173  | -3.800572504 | 2.85E-37 | -2.678376601 | 4.37E-32 |
| SERHL2   | 3.6823272   | -1.122313469 | 0.001304987 | -3.724715746 | 9.24E-22 | -2.602402277 | 2.36E-30 |
| LRRC50   | 3.510254364 | -1.123878352 | 0.00136219  | -4.003356614 | 5.75E-32 | -2.879478263 | 5.08E-37 |
| AGXT2L1  | 0.713960122 | -1.127231893 | 0.026874255 | -4.860594499 | 3.32E-31 | -3.733362606 | 3.08E-30 |
| CXXC4    | 2.341035509 | -1.13597438  | 0.002251409 | -3.083628046 | 7.34E-17 | -1.947653666 | 4.11E-17 |

|          |             |              |             |              |          |              |             |
|----------|-------------|--------------|-------------|--------------|----------|--------------|-------------|
| NOL4     | 1.832107608 | -1.143730667 | 0.041288678 | -5.663419142 | 3.65E-31 | -4.519688475 | 3.22E-37    |
| SLC38A3  | 4.900662325 | -1.154655887 | 0.024192627 | -2.274391634 | 2.63E-13 | -1.119735747 | 0.000187533 |
| C20orf56 | 0.865689846 | -1.158982204 | 0.008163204 | -2.838176353 | 2.67E-11 | -1.679194149 | 7.92E-10    |
| BEX1     | 6.080195157 | -1.161193735 | 0.020836028 | -4.169031458 | 1.67E-29 | -3.007837723 | 1.86E-22    |
| PYGM     | 5.032228825 | -1.161783481 | 0.016642916 | -3.597391216 | 3.16E-26 | -2.435607735 | 8.19E-17    |
| SPINK5   | 3.365843266 | -1.166400842 | 0.037544193 | -2.797866314 | 2.72E-07 | -1.631465472 | 1.58E-06    |
| CD36     | 8.004539076 | -1.169382079 | 0.0050683   | -2.942390417 | 3.12E-20 | -1.773008339 | 5.81E-13    |
| LOC25455 | 4.260411325 | -1.170750526 | 0.04947947  | -3.248517836 | 9.40E-15 | -2.077767309 | 1.74E-09    |
| GABRB3   | 6.195232278 | -1.182529946 | 0.02756969  | -3.934110581 | 4.43E-21 | -2.751580635 | 3.57E-18    |
| LIX1     | 5.775731246 | -1.193047693 | 0.047103343 | -3.032663236 | 4.91E-14 | -1.839615542 | 2.50E-07    |
| IRS4     | 1.690561218 | -1.210206838 | 0.011020387 | -4.987679982 | 1.96E-24 | -3.777473145 | 2.94E-33    |
| GCK      | 2.006159134 | -1.211285026 | 0.004710521 | -3.174374273 | 3.72E-20 | -1.963089247 | 1.39E-13    |
| APOA1    | 3.073454245 | -1.233598848 | 0.020894416 | -3.981016489 | 1.30E-23 | -2.74741764  | 1.46E-17    |
| KIF5A    | 3.299530772 | -1.234236283 | 0.037806784 | -2.613243104 | 5.29E-08 | -1.37900682  | 0.000136897 |
| SLC14A2  | 2.359123287 | -1.237594265 | 0.0347176   | -2.916568293 | 1.68E-13 | -1.678974028 | 2.09E-06    |
| GPR158   | 2.614082395 | -1.244760515 | 0.003604745 | -2.76009704  | 3.29E-16 | -1.515336525 | 9.19E-09    |
| COL9A3   | 5.859605618 | -1.269582644 | 0.045168558 | -4.808392525 | 7.70E-18 | -3.538809881 | 1.36E-19    |
| FAM167A  | 8.820425469 | -1.2724462   | 0.004740177 | -4.342740254 | 1.32E-28 | -3.070294054 | 2.36E-27    |
| SLC26A7  | 10.44461739 | -1.275440041 | 0.016595618 | -5.048388392 | 5.13E-25 | -3.772948351 | 7.87E-31    |

|          |             |              |             |              |          |              |          |
|----------|-------------|--------------|-------------|--------------|----------|--------------|----------|
| FOXA2    | 4.243292214 | -1.276712194 | 0.046868551 | -4.798704267 | 5.01E-23 | -3.521992074 | 4.76E-20 |
| NPR3     | 4.776103547 | -1.277029122 | 0.011221724 | -3.505337316 | 6.58E-18 | -2.228308194 | 4.97E-13 |
| KHDRBS2  | 3.843867088 | -1.278772407 | 0.006587165 | -4.728510181 | 9.61E-30 | -3.449737774 | 2.62E-31 |
| UPF0639  | 1.371822085 | -1.292674331 | 0.011589552 | -5.211647155 | 7.50E-36 | -3.918972825 | 4.13E-33 |
| NWD1     | 2.969101808 | -1.294183643 | 0.028087588 | -5.636627112 | 6.30E-31 | -4.342443468 | 1.40E-32 |
| C12orf39 | 2.149780156 | -1.297944624 | 0.011569754 | -5.265916438 | 1.63E-32 | -3.967971814 | 9.21E-34 |
| UNC5D    | 2.231888277 | -1.29820735  | 0.011034859 | -2.704646695 | 2.77E-10 | -1.406439345 | 1.12E-05 |
| TPTE2P1  | 3.461706131 | -1.303972695 | 0.013718542 | -5.056772406 | 3.94E-29 | -3.752799712 | 2.75E-29 |
| C18orf16 | 1.706346578 | -1.319451075 | 0.002931882 | -2.46851107  | 4.36E-17 | -1.149059995 | 1.91E-05 |
| DNASE1L3 | 6.021095295 | -1.325794007 | 0.000895175 | -2.615477365 | 3.24E-15 | -1.289683358 | 5.30E-08 |
| ZNF560   | 2.332410033 | -1.345890806 | 0.030825776 | 1.389351504  | 6.25E-05 | 2.735242311  | 7.24E-14 |
| DKFZP434 | 2.115707093 | -1.354370361 | 0.00185329  | -2.469594885 | 1.12E-13 | -1.115224525 | 2.25E-05 |
| SLC4A4   | 7.380104284 | -1.357440299 | 0.00337746  | -5.174470384 | 2.06E-33 | -3.817030085 | 2.53E-38 |
| LRRTM1   | 2.959084575 | -1.362404187 | 0.03779708  | -3.333726857 | 4.80E-12 | -1.971322669 | 5.78E-07 |
| SELV     | 2.146775613 | -1.363614849 | 0.024732188 | -5.545031903 | 4.81E-36 | -4.181417053 | 8.06E-29 |
| TRPM3    | 0.855939207 | -1.367677688 | 0.00243958  | -5.089146853 | 1.55E-32 | -3.721469165 | 4.51E-36 |
| ZNF536   | 1.814294611 | -1.370929796 | 0.016569151 | -5.644863916 | 2.35E-37 | -4.27393412  | 1.35E-32 |
| LOC10013 | 3.459103307 | -1.402050748 | 0.007507122 | -4.918367111 | 5.37E-27 | -3.516316363 | 5.93E-28 |
| MRO      | 3.791583503 | -1.414434994 | 0.013673064 | -6.228919    | 4.76E-39 | -4.814484006 | 1.67E-39 |

|          |             |              |             |              |          |              |             |
|----------|-------------|--------------|-------------|--------------|----------|--------------|-------------|
| CIB4     | 0.914116274 | -1.456136209 | 0.001346485 | -4.076755508 | 3.97E-31 | -2.6206193   | 6.30E-20    |
| LOC28600 | 9.897232779 | -1.49669228  | 0.026059007 | -5.101336319 | 7.71E-26 | -3.604644039 | 1.39E-19    |
| C7orf52  | 2.616636046 | -1.516144301 | 0.01134709  | -4.235785879 | 1.90E-20 | -2.719641577 | 4.76E-14    |
| ABCC8    | 3.750668059 | -1.517554215 | 0.03434172  | -4.582507045 | 2.61E-20 | -3.064952829 | 6.94E-13    |
| HS6ST3   | 4.175316134 | -1.540194976 | 0.00185329  | -4.978811765 | 5.92E-32 | -3.438616789 | 2.44E-28    |
| STXBP5L  | 3.960315259 | -1.556183753 | 0.013387784 | -6.495549344 | 2.11E-34 | -4.939365591 | 1.24E-35    |
| PKNOX2   | 5.683304527 | -1.571015621 | 0.026593714 | -5.326950746 | 2.04E-25 | -3.755935126 | 3.23E-19    |
| CHRNA4   | 2.877808302 | -1.597142164 | 0.01201356  | -5.050288841 | 1.50E-22 | -3.453146677 | 3.14E-19    |
| KCNJ13   | 3.560246396 | -1.5993816   | 0.004904046 | -4.604081719 | 1.05E-21 | -3.004700119 | 2.03E-17    |
| KCNAB1   | 7.919545218 | -1.608148874 | 0.000541541 | -3.786675765 | 3.52E-29 | -2.178526891 | 1.07E-14    |
| GRIK4    | 3.557094074 | -1.626204335 | 0.001346485 | -4.894848464 | 9.61E-30 | -3.26864413  | 1.37E-24    |
| WNT4     | 4.684610788 | -1.659186576 | 0.000361761 | -3.820439432 | 2.13E-22 | -2.161252856 | 3.97E-14    |
| TRPV6    | 4.027897744 | -1.691575485 | 0.000454108 | -3.098558314 | 1.68E-23 | -1.406982829 | 1.13E-06    |
| FLRT1    | 4.168981918 | -1.717436169 | 0.000568042 | -5.29531421  | 2.19E-33 | -3.577878041 | 8.62E-30    |
| LECT1    | 3.252696424 | -1.752827084 | 0.020575083 | -4.767826941 | 4.26E-21 | -3.014999856 | 1.96E-11    |
| FOXJ1    | 3.714437    | -1.76983176  | 0.004163456 | -5.838354277 | 1.77E-27 | -4.068522518 | 9.70E-26    |
| PKHD1L1  | 6.173578035 | -1.88419602  | 0.032193638 | -7.876580457 | 4.62E-29 | -5.992384437 | 4.57E-29    |
| LOC10013 | 3.030855369 | -1.892567595 | 0.000294649 | -2.933111897 | 6.10E-15 | -1.040544302 | 0.000908078 |
| TPO      | 11.12584274 | -1.975085722 | 0.005288505 | -6.925495438 | 4.59E-32 | -4.950409716 | 8.93E-30    |

|      |             |              |             |              |          |              |          |
|------|-------------|--------------|-------------|--------------|----------|--------------|----------|
| EDN3 | 5.396335421 | -2.334551611 | 0.004041661 | -6.200850521 | 2.34E-23 | -3.866298911 | 1.87E-15 |
| CA4  | 4.957288696 | -2.648212423 | 0.000332484 | -6.191657395 | 3.13E-26 | -3.543444972 | 1.01E-15 |

---



Supplementary Table S3. Enriched GO and KEGG terms of 25 genes identified in the three subnetworks and 8 hub genes.

| Pathway ID                             | pathway description                | observed   |                      |
|----------------------------------------|------------------------------------|------------|----------------------|
|                                        |                                    | gene count | false discovery rate |
| <b>For 25 genes in the subnetworks</b> |                                    |            |                      |
| <b>GO: Cell component</b>              |                                    |            |                      |
| GO.000561                              | extracellular space                | 16         | 3.34E-11             |
| GO.000558                              | collagen trimer                    | 8          | 5.83E-11             |
| GO.009864                              | complex of collagen trimers        | 5          | 2.52E-08             |
| GO.000557                              | proteinaceous extracellular matrix | 9          | 3.65E-08             |
| GO.000558                              | fibrillar collagen trimer          | 4          | 1.99E-07             |
| GO.009864                              | banded collagen fibril             | 4          | 1.99E-07             |
| GO.004442                              | extracellular region part          | 18         | 3.68E-07             |
| GO.000557                              | extracellular region               | 18         | 5.51E-06             |
| GO.000578                              | endoplasmic reticulum lumen        | 6          | 1.44E-05             |
| GO.004442                              | extracellular matrix component     | 5          | 3.88E-05             |
| <b>GO: Biological process</b>          |                                    |            |                      |
| GO.003019                              | extracellular matrix organization  | 13         | 1.90E-13             |
| GO.002261                              | extracellular matrix disassembly   | 9          | 2.78E-11             |
| GO.003057                              | collagen catabolic process         | 8          | 4.43E-11             |
| GO.000960                              | response to external stimulus      | 15         | 1.40E-07             |
| GO.002241                              | cellular component disassembly     | 10         | 1.64E-07             |
| GO.000693                              | chemotaxis                         | 10         | 9.08E-07             |
| GO.004471                              | single-organism catabolic process  | 10         | 1.90E-05             |
| GO.006032                              | cell chemotaxis                    | 6          | 2.87E-05             |
| GO.001647                              | cell migration                     | 9          | 6.85E-05             |
| GO.005167                              | localization of cell               | 9          | 0.000128             |
| GO.004001                              | locomotion                         | 10         | 0.000215             |
| GO.000150                              | ossification                       | 6          | 0.000268             |
| GO.000695                              | immune response                    | 10         | 0.000476             |
|                                        | movement of cell or subcellular    |            |                      |
| GO.000692                              | component                          | 10         | 0.000482             |

|                               |                                             |    |          |
|-------------------------------|---------------------------------------------|----|----------|
| GO.004222                     | response to chemical                        | 15 | 0.000633 |
| GO.000961                     | response to mechanical stimulus             | 5  | 0.0018   |
| GO.006144                     | connective tissue development               | 5  | 0.002    |
|                               | cartilage development involved in           |    |          |
| GO.006035                     | endochondral bone morphogenesis             | 3  | 0.00227  |
| GO.000726                     | cell-cell signaling                         | 8  | 0.00274  |
| GO.005170                     | response to other organism                  | 7  | 0.00359  |
| GO.000961                     | response to bacterium                       | 6  | 0.00483  |
| GO.003019                     | collagen fibril organization                | 3  | 0.0057   |
| GO.007088                     | cellular response to chemical stimulus      | 11 | 0.0057   |
| GO.003249                     | response to lipopolysaccharide              | 5  | 0.00597  |
| GO.003399                     | response to lipid                           | 7  | 0.00766  |
| GO.003296                     | collagen biosynthetic process               | 2  | 0.00821  |
| GO.000237                     | immune system process                       | 10 | 0.00955  |
| GO.000988                     | tissue development                          | 9  | 0.00955  |
| GO.003598                     | tendon development                          | 2  | 0.0106   |
| GO.005121                     | cartilage development                       | 4  | 0.0107   |
| GO.006035                     | endochondral bone morphogenesis             | 3  | 0.016    |
| GO.000715                     | cell adhesion                               | 7  | 0.0225   |
| GO.000905                     | catabolic process                           | 9  | 0.0225   |
| GO.003121                     | biomineral tissue development               | 3  | 0.0289   |
| GO.004860                     | reproductive structure development          | 5  | 0.0289   |
| GO.000695                     | response to stress                          | 12 | 0.0294   |
| GO.006145                     | reproductive system development             | 5  | 0.0294   |
| GO.000695                     | inflammatory response                       | 5  | 0.0302   |
| GO.001604                     | cellular component organization             | 14 | 0.0302   |
| GO.004470                     | single organism reproductive process        | 7  | 0.0323   |
| GO.001003                     | response to organic substance               | 10 | 0.0424   |
| GO.000341                     | growth plate cartilage development          | 2  | 0.0435   |
| <b>GO: Molecular function</b> |                                             |    |          |
| GO.000520                     | extracellular matrix structural constituent | 6  | 5.13E-07 |
| GO.000800                     | chemokine activity                          | 5  | 3.42E-06 |
| GO.000512                     | cytokine receptor binding                   | 7  | 3.89E-06 |

|           |                                        |    |          |
|-----------|----------------------------------------|----|----------|
| GO.000512 | cytokine activity                      | 6  | 1.62E-05 |
| GO.000551 | protein binding                        | 17 | 0.000352 |
| GO.000553 | glycosaminoglycan binding              | 5  | 0.00154  |
| GO.000510 | receptor binding                       | 8  | 0.00975  |
| GO.000820 | heparin binding                        | 4  | 0.0109   |
| GO.004840 | platelet-derived growth factor binding | 2  | 0.0269   |
| GO.004339 | proteoglycan binding                   | 2  | 0.05     |

#### **KEGG pathways**

|      |                                        |   |          |
|------|----------------------------------------|---|----------|
| 4060 | Cytokine-cytokine receptor interaction | 8 | 1.03E-07 |
| 4512 | ECM-receptor interaction               | 6 | 1.03E-07 |
| 4062 | Chemokine signaling pathway            | 7 | 1.35E-07 |
| 4510 | Focal adhesion                         | 6 | 9.35E-06 |
| 4151 | PI3K-Akt signaling pathway             | 6 | 0.000135 |
| 4974 | Protein digestion and absorption       | 4 | 0.000135 |
| 5323 | Rheumatoid arthritis                   | 4 | 0.000135 |
| 5146 | Amoebiasis                             | 4 | 0.000263 |
| 4611 | Platelet activation                    | 4 | 0.000501 |
| 4064 | NF-kappa B signaling pathway           | 3 | 0.00474  |
| 4668 | TNF signaling pathway                  | 3 | 0.00747  |
| 5206 | MicroRNAs in cancer                    | 3 | 0.0164   |

#### **For 8 hub genes**

##### **GO: Cell component**

|            |                                    |   |          |
|------------|------------------------------------|---|----------|
| GO:0005581 | collagen trimer                    | 5 | 1.06E-07 |
| GO:0005788 | endoplasmic reticulum lumen        | 5 | 2.86E-06 |
| GO:0005583 | fibrillar collagen trimer          | 3 | 3.53E-06 |
| GO:0098643 | banded collagen fibril             | 3 | 3.53E-06 |
| GO:0005578 | proteinaceous extracellular matrix | 4 | 0.00111  |
| GO:0005783 | endoplasmic reticulum              | 5 | 0.0159   |

##### **GO: Biological process**

|            |                                  |   |          |
|------------|----------------------------------|---|----------|
| GO:0030574 | collagen catabolic process       | 5 | 1.93E-07 |
| GO:0022617 | extracellular matrix disassembly | 5 | 5.71E-07 |
| GO:0030199 | collagen fibril organization     | 3 | 0.000504 |
| GO:0040011 | locomotion                       | 6 | 0.000726 |

|            |                                                                               |   |         |
|------------|-------------------------------------------------------------------------------|---|---------|
| GO:0006935 | chemotaxis                                                                    | 5 | 0.00107 |
| GO:0032964 | collagen biosynthetic process                                                 | 2 | 0.00198 |
| GO:0035989 | tendon development                                                            | 2 | 0.00258 |
| GO:0009605 | response to external stimulus<br>movement of cell or subcellular<br>component | 6 | 0.00656 |
| GO:0006928 | component                                                                     | 5 | 0.0266  |
| GO:0061448 | connective tissue development                                                 | 3 | 0.034   |

**GO: Molecular function**

|            |                                             |   |          |
|------------|---------------------------------------------|---|----------|
| GO:0005201 | extracellular matrix structural constituent | 4 | 2.48E-05 |
| GO:0048407 | platelet-derived growth factor binding      | 2 | 0.0151   |

**KEGG pathways**

|      |                                        |   |          |
|------|----------------------------------------|---|----------|
| 4974 | Protein digestion and absorption       | 4 | 5.25E-06 |
| 4512 | ECM-receptor interaction               | 3 | 0.000548 |
| 5146 | Amoebiasis                             | 3 | 0.000671 |
| 4611 | Platelet activation                    | 3 | 0.000896 |
| 4062 | Chemokine signaling pathway            | 3 | 0.00202  |
| 4510 | Focal adhesion                         | 3 | 0.00245  |
| 4060 | Cytokine-cytokine receptor interaction | 3 | 0.00444  |
| 4151 | PI3K-Akt signaling pathway             | 3 | 0.0083   |
| 5323 | Rheumatoid arthritis                   | 2 | 0.015    |
| 4668 | TNF signaling pathway                  | 2 | 0.0209   |

---
